# Supplementary material for: Tropospheric nitrogen dioxide levels vary diurnally in Asian cities
Source: Springer Nature journal article supplement (doi:10.1038/s43247-025-02272-7), 2025-05-19
Supplement: MOESM3 [file 43247_2025_2272_MOESM3_ESM.docx]

Description of Additional Supplementary Files

**File name:** Supplementary video 1

**Description:** This animation shows the tropospheric nitrogen dioxide (NO₂) vertical column density observed by the Geostationary Environment Monitoring Spectrometer (GEMS) over the GEMS domain at 09:00, 11:00, 13:00, and 15:00 KST. In addition, this illustrates the spatial distribution and daytime variation of tropospheric NO₂ over the Seoul Metropolitan Area from 8 AM to 4 PM LT. The animation also includes estimated top-down NOₓ emissions derived using the GEMS daytime observations.
